# Supplementary material for: A GalNAc/Gal-specific lectin from the sea mussel Crenomytilus grayanus modulates immune response in macrophages and in mice
Source: PubMed Central journal article supplement (PMC5524719; doi:10.1038/s41598-017-06647-5), 2017-07-24
Supplement: 41598_2017_6647_MOESM1_ESM.pdf [file 41598_2017_6647_MOESM1_ESM.pdf]

**Supplementary information for**

**A GalNAc/Gal-specific lectin from the sea mussel *Crenomytilus grayanus*  
modulates immune response in macrophages and in mice**

Oleg V. Chernikov<sup>1,#</sup>, Wei-Ting Wong<sup>2,3,#</sup>, Lan-Hui Li<sup>4</sup>, Irina V. Chikalovets<sup>1,5</sup>,  
Valentina I. Molchanova<sup>1</sup>, Shih-Hsiung Wu<sup>6</sup>, Jiahn-Haur Liao<sup>6</sup>, Kuo-Feng Hua<sup>2,7,\*</sup>

<sup>1</sup>G.B. Elyakov Pacific Institute of Bioorganic Chemistry FEB RAS, Vladivostok, Russia; <sup>2</sup>Department of Biotechnology and Animal Science, National Ilan University, Ilan, Taiwan; <sup>3</sup>Graduate Institute of Life Sciences, National Defense Medical Center, Taipei, Taiwan; <sup>4</sup>Department of Laboratory, Kunming Branch, Taipei City Hospital, Taipei, Taiwan; <sup>5</sup>School of Natural Sciences, Far Eastern Federal University, Vladivostok, Russia; <sup>6</sup>Institute of Biological Chemistry, Academia Sinica, Taipei, Taiwan; <sup>7</sup>Department of Pathology, Tri-Service General Hospital, National Defense Medical Center, Taipei, Taiwan

\*Correspondence to:

Dr. Kuo-Feng Hua

Department of Biotechnology and Animal Science,

National Ilan University, Ilan, Taiwan

No. 1, Sec. 1, Shennong Rd., Ilan 260, Taiwan

Tel: +(886)-3-935-7626

Fax: +(886)-3-931-1526

E-mail: kuofenghua@gmail.com

<sup>#</sup>These authors contributed equally to this work.

Fig. S1

A (full gels of Fig.1A)

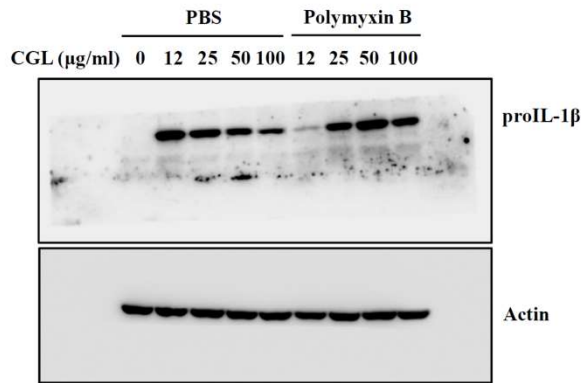

B (full gels of Fig. 1B)

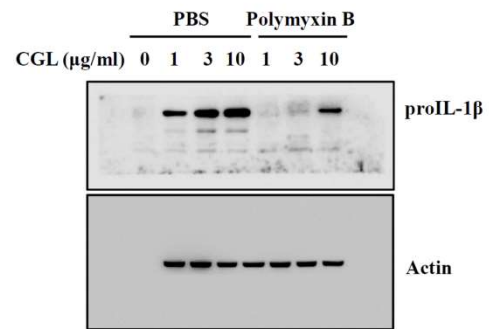

Fig. S1. The full-length gels of Figs.1A and 1B.

Fig. S2

A (full gels of Fig. 3C)

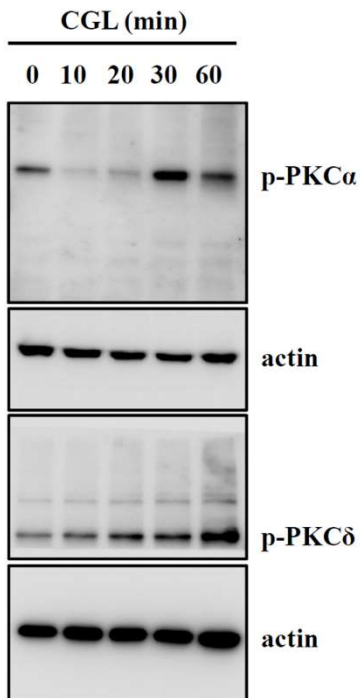

B (full gels of Fig. 3E)

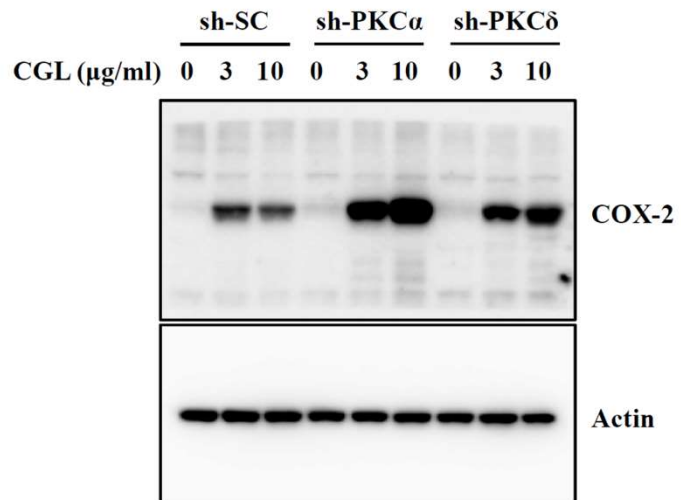

Fig. S2. The full-length gels of Figs. 3C and 3E.

Fig. S3

A (full gels of Fig. 4A)

B (full gels of Fig. 4B)

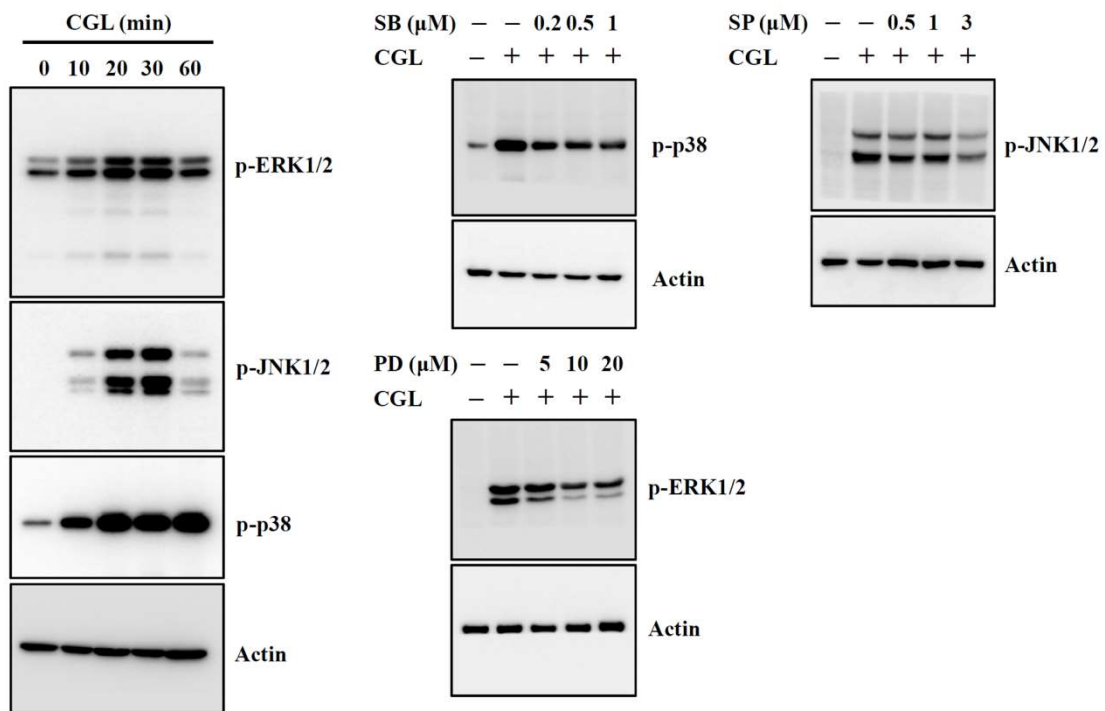

Fig. S3. The full-length gels of Figs. 4A and 4B.

Fig. S4 (full gels of Fig. 5B)

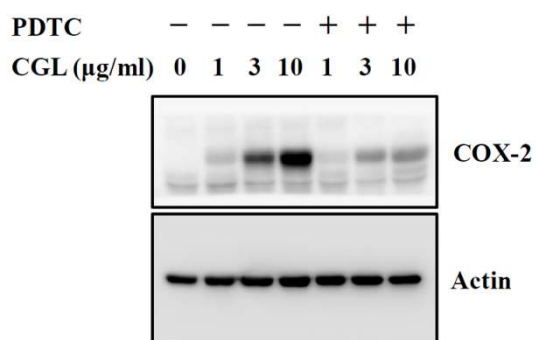

Fig. S4. The full-length gels of Fig. 5B.

**Fig. S5 (full gels of Fig. 6A)**

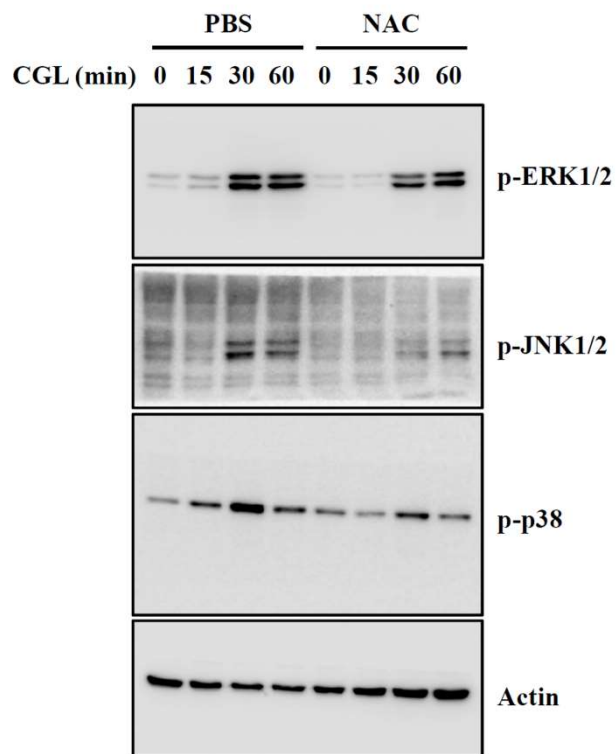

**Fig. S5. The full-length gels of Fig. 6A.**

Fig. S6

A (full gels of Fig. 7C)

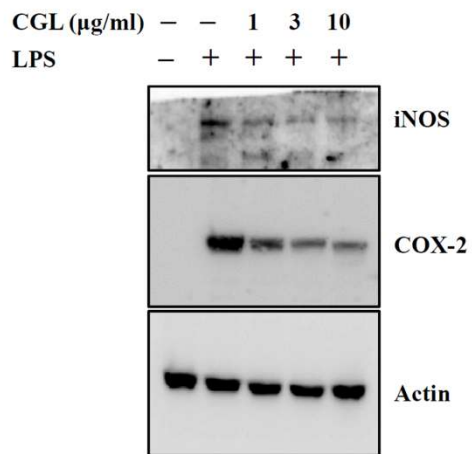

B (full gels of Fig. 7D)

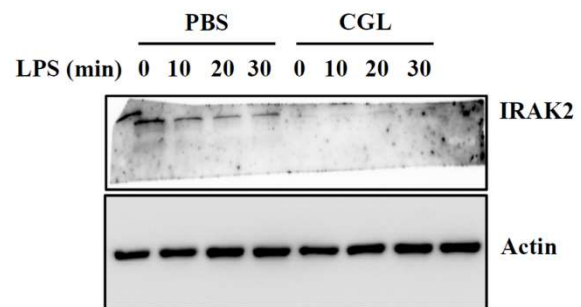

C (full gels of Fig. 7E)

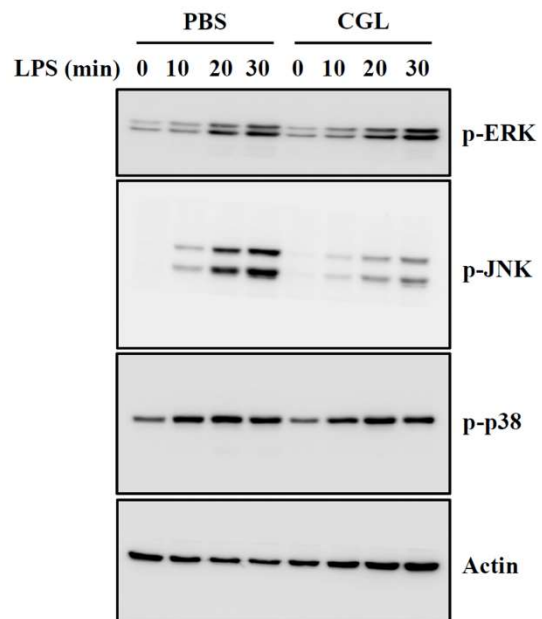

Fig. S6. The full-length gels of Figs. 7C, 7D and 7E.
